# Supplementary material for: Hydrological Modeling in the Upper Lancang-Mekong River Basin Using Global and Regional Gridded Meteorological Re-Analyses
Source: MDPI journal article supplement (doi:10.3390/w15122209), 2023-06-12
Supplement: s1 [file s1]

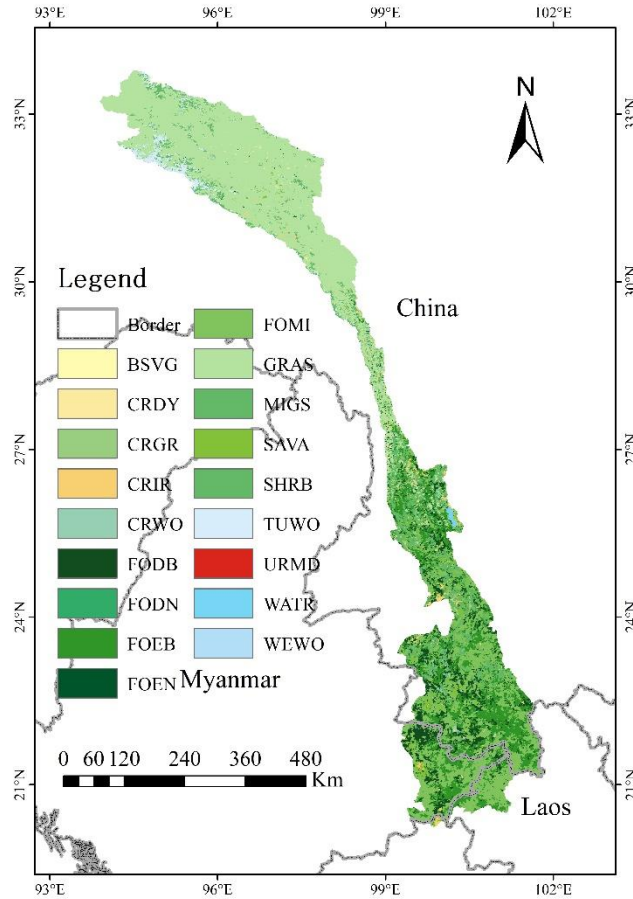

**Figure S1.** Map of land use/land cover distribution in the upper Lancang-Mekong River Basin. Note: BSVG: barren or sparsely vegetated; CRDY: dryland, cropland, and pasture; CRGR: cropland/grassland; CRIR: irrigated cropland and pasture; CRWO: cropland/woodland; FODB: deciduous broadleaf forest; FODN: deciduous needleleaf forest; FOEB: evergreen broadleaf forest; FOEN: evergreen needleleaf forest; FOMI: mixed forest; GRAS: grassland; MIGS: mixed shrubland/grassland; SAVA: savanna; SHRB: shrubland; TUWO: wooded tundra; URMD: urban and built-up land; WATR: snow or ice; WEWO: wooded wetland.

**Table S1.** Dominant land cover classes in the upper Lancang-Mekong River Basin.

| Abbreviation | Land Cover Type                | Area (% of the basin) |
|--------------|--------------------------------|-----------------------|
| GRAS         | Grassland                      | 38.34%                |
| FOMI         | Mixed forest                   | 20.70%                |
| FOEB         | Evergreen broadleaf forest     | 15.33%                |
| SHRB         | Shrubland                      | 11.36%                |
| FODB         | Deciduous broadleaf forest     | 8.71%                 |
| SAVA         | Savanna                        | 2.42%                 |
| TUWO         | Wooded tundra                  | 1.80%                 |
| CRIR         | Irrigated cropland and pasture | 1.35%                 |

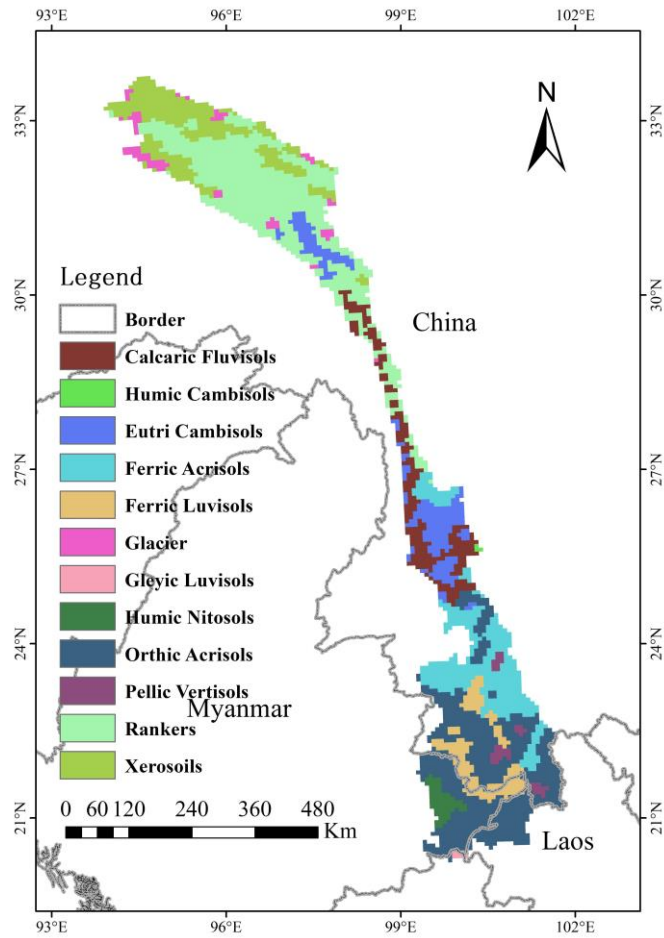

**Figure S2.** Map of soil type distribution in the upper Lancang-Mekong River Basin [37].

**Table S2.** Major soil types in the upper Lancang-Mekong River Basin.

| FAO Soil Name         | Area<br>(% of the<br>Basin) | Texture             | Hydrologic Soil<br>Group * | Moist Bulk<br>Density<br>(g/cm <sup>3</sup> ) | Saturated<br>Hydraulic<br>Conductivity<br>(mm/hr) | Available Water<br>Holding Capacity<br>(mm H <sub>2</sub> O/mm Soil) |
|-----------------------|-----------------------------|---------------------|----------------------------|-----------------------------------------------|---------------------------------------------------|----------------------------------------------------------------------|
| Rankers               | 25.07%                      | LOAM                | C                          | 1.2                                           | 14.38                                             | 0.06                                                                 |
| Orthic Acrisols       | 23.94%                      | SANDY_CLAY_<br>LOAM | C                          | 1.3                                           | 7.27                                              | 0.06                                                                 |
| Ferric Luvisols       | 12.98%                      | SANDY_CLAY_<br>LOAM | C                          | 1.2                                           | 14.66                                             | 0.03                                                                 |
| Xerosols              | 11.11%                      | LOAM                | D                          | 1.4                                           | 6.24                                              | 0.07                                                                 |
| Calcaric<br>Fluvisols | 7.95%                       | LOAM                | D                          | 1.4                                           | 5.21                                              | 0.17                                                                 |
| Eutri Cambisols       | 7.89%                       | LOAM                | D                          | 1.3                                           | 7.99                                              | 0.08                                                                 |
| Ferric Luvisols       | 5.41%                       | CLAY                | C                          | 1.3                                           | 9.16                                              | 0.07                                                                 |
| Glacier               | 2.34%                       | UWB                 | D                          | 2.5                                           | 99                                                | 0.01                                                                 |
| Humic Nitosols        | 1.83%                       | CLAY_LOAM           | C                          | 1.2                                           | 12.6                                              | 0.17                                                                 |
| Pellic Vertisols      | 1.39%                       | CLAY                | C                          | 1.1                                           | 23.2                                              | 0.12                                                                 |
| Humic<br>Cambisols    | 0.09%                       | LOAM                | C                          | 1.0                                           | 33.91                                             | 0.06                                                                 |

\* Note—The hydrologic soil group was divided into the following four subgroups (Neitsch et al., 2011, [40]): A (low runoff potential)—these soils have a high infiltration rate even when thoroughly wetted; they chiefly consist

of deep, well-drained to excessively drained sands or gravels; and they have a high rate of water transmission. B—these soils have a moderate infiltration rate when thoroughly wetted; they are mostly moderately deep to deep and moderately well-drained to well-drained soils that have moderately fine to moderately coarse textures; and they have a moderate rate of water transmission. C—these soils have a slow infiltration rate when thoroughly wetted; they chiefly have a layer that impedes the downward movement of water or have a moderately fine to fine texture; and they have a slow rate of water transmission. D (high runoff potential)—these soils have a very slow infiltration rate when thoroughly wetted; they chiefly consist of clay soils that have a high swelling potential, soils that have a permanent water table, soils that have a claypan or clay layer at or near the surface, and shallow soils over nearly impervious material; and they have a very slow rate of water transmission.

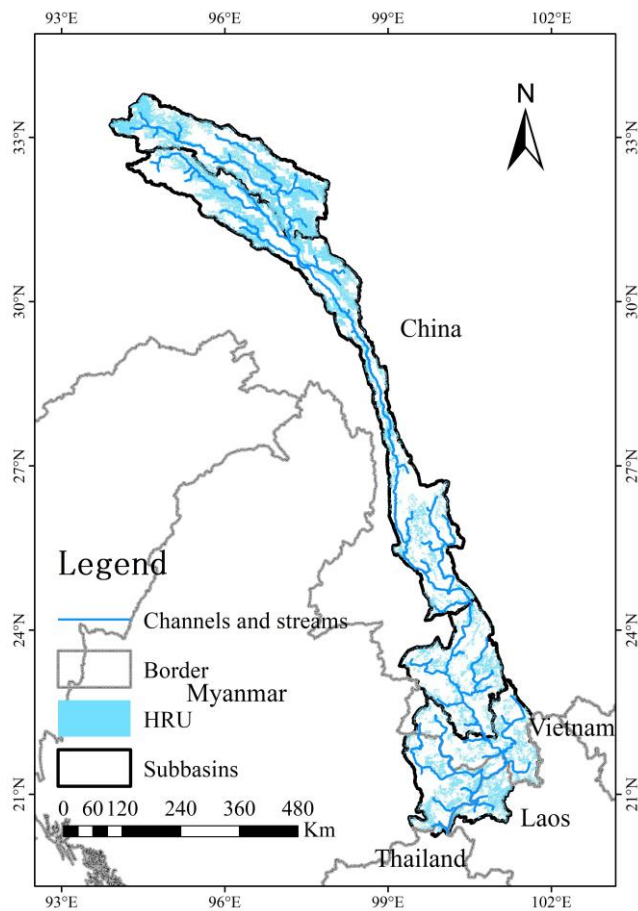

**Figure S3.** The channels and streams in the upper Lancang-Mekong River Basin.
